# Supplementary material for: Alkali induced changes in spatial distribution of functional groups in carboxymethylated cellulose
Source: Springer Nature journal article supplement (doi:10.1007/s10570-024-05798-9), 2024-03-01
Supplement: MOESM1 [file 26822088]

# **Alkali induced changes in spatial distribution of functional groups in carboxymethylated cellulose**

*Cellulose*

Paul Bogner, Thomas Bechtold, Tung Pham, Avinash P. Manian\*

Universität Innsbruck, Research Institute of Textile  
Chemistry/Physics, Hoechsterstrasse 73, 6850 Dornbirn, Austria

\* Author for correspondence: [avinash.manian@uibk.ac.at](mailto:avinash.manian@uibk.ac.at); +43 5572  
28533

**Table S1** Results of carboxyl group content, methylene blue sorption and FTIR ratio measurements on fibers from the additional set of treatments in reaction media containing 4 mol/L NaOH with the  $\eta p$  sequence. Mean values from three replicates are shown along with their standard deviation (in parentheses)

| Treatment variables |            | Carboxyl group content (mmol/kg) |                    | MB Sorption (mmol/kg) <sup>c</sup> | Normalized FTIR absorbance <sup>d</sup> |                  |
|---------------------|------------|----------------------------------|--------------------|------------------------------------|-----------------------------------------|------------------|
| MCA (mol/L)         | Temp. (°C) | A-B <sup>a</sup>                 | Cond. <sup>b</sup> |                                    | ATR                                     | KBR              |
| 0.161               | 30         | 192.5<br>(0.8)                   | — <sup>e</sup>     | 40.2<br>(1.3)                      | 0.349<br>(0.049)                        | 0.297<br>(0.034) |
|                     | 50         | 168.9<br>(4.1)                   | —                  | 35.2<br>(0.2)                      | 0.290<br>(0.006)                        | 0.237<br>(0.009) |
| 0.322               | 30         | 317.7<br>(2.9)                   | 284.9<br>(5.5)     | 64.0<br>(3.0)                      | 0.564<br>(0.005)                        | 0.338<br>(0.023) |
|                     | 50         | 285.2<br>(1.1)                   | 269.0<br>(11.9)    | 60.1<br>(1.4)                      | 0.534<br>(0.025)                        | 0.315<br>(0.031) |

<sup>a</sup> back titration, <sup>b</sup> conductometric titration, <sup>c</sup> methylene blue sorption, <sup>d</sup> absorbance intensities at 1591 cm<sup>-1</sup> (ATR) and 1600 cm<sup>-1</sup> (KBr, i.e. transmittance) normalized with respect to the absorbance intensity at 1156 cm<sup>-1</sup>, <sup>e</sup> signifies not measured.

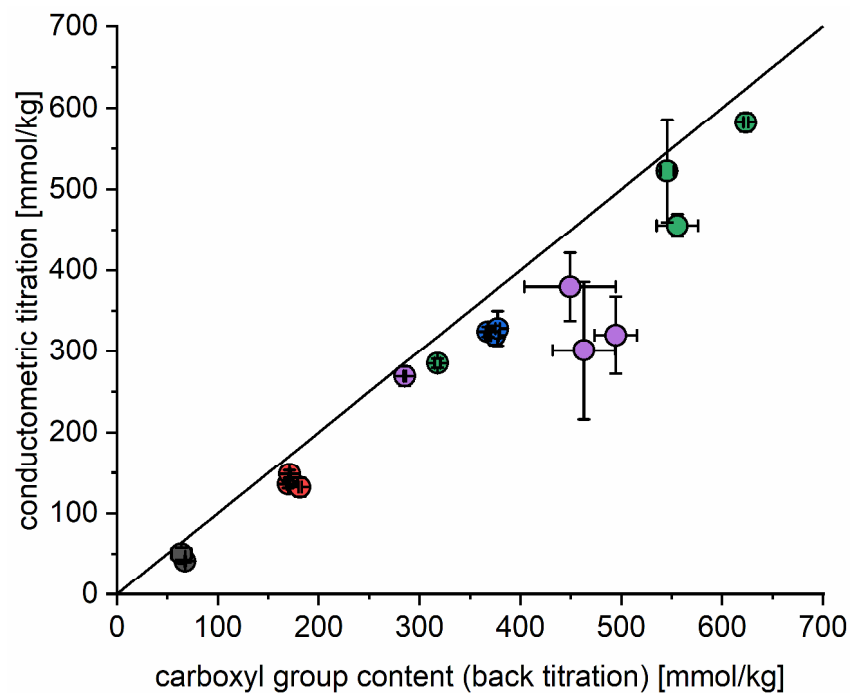

**Fig. S1** Comparison of carboxyl contents determined with conductometric titration vs. back titration, including data from the additional treatments. The diagonal line in each plot represents a 1:1 relationship between the abscissa and ordinate. The marker colors represent treatment sets: demineralized and no-MCA blank (●), in 0.5 mol/L NaOH at 30°C (●), in 0.5 mol/L NaOH at 50°C (●), in 4 mol/L NaOH at 30°C (●) and in 4 mol/L NaOH at 50°C (●)

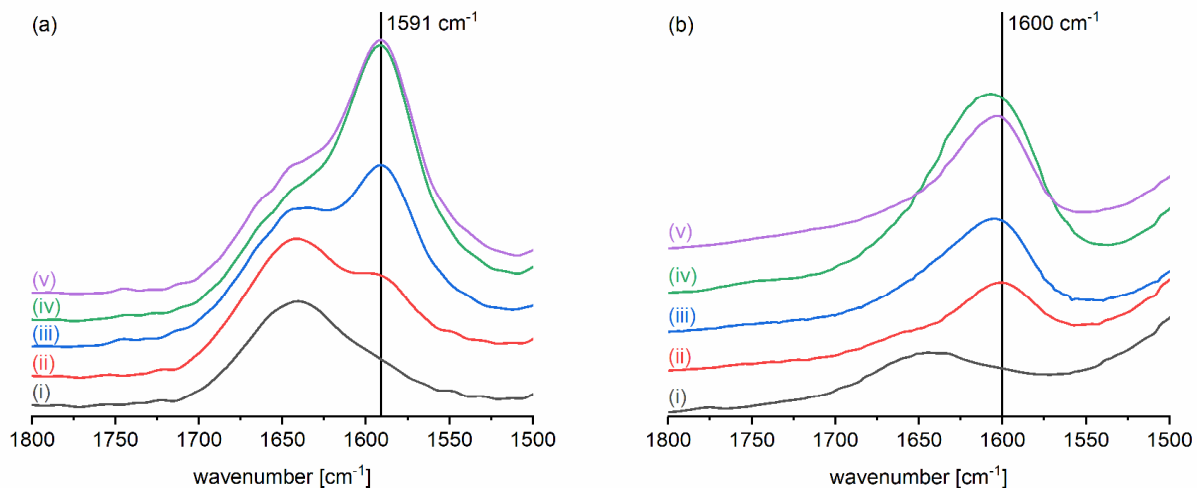

**Fig. S2** The region  $1500\text{--}1800 \text{ cm}^{-1}$  from FTIR spectroscopy in (a) ATR mode and (b) transmission mode (with KBr pellets). The trace labels indicate: (i) blank and demineralized samples and samples carboxymethylated in (ii) 0.5 mol/L NaOH at  $30^\circ\text{C}$ , (iii) in 0.5 mol/L NaOH at  $50^\circ\text{C}$ , (iv) in 4 mol/L NaOH at  $30^\circ\text{C}$ , and (v) in 4 mol/L NaOH at  $50^\circ\text{C}$

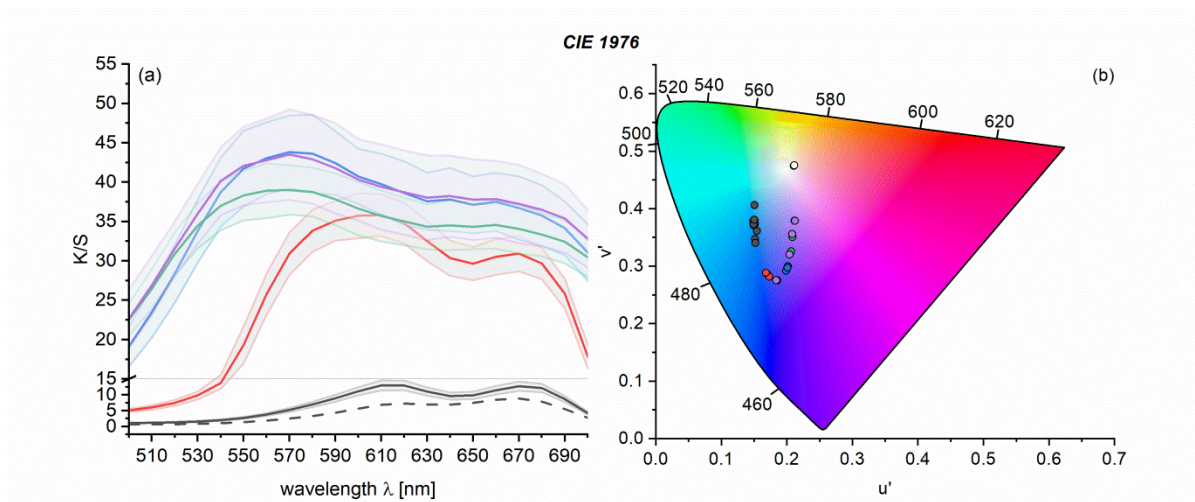

**Fig. S3** (a) Absorbance spectra (as calculated with  $K/S_\lambda$ ) from selected samples after methylene blue sorption: demineralized (---), no-MCA blank (—), carboxymethylated in 0.5 mol/L NaOH at 30°C (—), in 0.5 mol/L NaOH at 50°C (—), in 0.5 mol/L NaOH at 50°C (—), in 4 mol/L NaOH at 50°C (—) (b) color coordinates of the dyed samples plotted on CIE 1931 color space: demineralized and no-MCA blank (●), in 0.5 mol/L NaOH at 30°C (●), in 0.5 mol/L NaOH at 50°C (●), in 4 mol/L NaOH at 30°C (●) and in 4 mol/L NaOH at 50°C (●)
